# Supplementary material
Source: PubMed Central journal article supplement (PMC3370531)
Supplement: supp_78.12.4164_AEM00622-12_supplemental.pdf [file supp_78.12.4164_AEM00622-12_supplemental.pdf]

**TABLE S1.** Strains and plasmids used in this study

| Strain or plasmid                          | Characteristics                                                                                                                                              | References |
|--------------------------------------------|--------------------------------------------------------------------------------------------------------------------------------------------------------------|------------|
| Strains                                    |                                                                                                                                                              |            |
| <i>E.coli</i> JM110                        | <i>Dam, dcm, supE44, hsdR17, thi, leu, rpsL1, lacY, galK, galT, ara, tonA, thr, tsx, (lac-proAB) (F', traD36, proAB, lacI<sup>q</sup>Z M15)</i>              | 22         |
| <i>E.coli</i> SCS110                       | <i>RpsL(str<sup>r</sup>), thr, leu, endA, thi-1, lacY, galK, galT, ara, tonA, tsx, dam, dcm, supE44, (lac-proAB) (F' traD36 proAB lacI<sup>q</sup>Z M15)</i> | 22         |
| BT185                                      | <i>B. thuringiensis</i> strain containing <i>cry8Ea1</i> and <i>cry8Fa1</i> gene                                                                             | 21, 29     |
| HD-73                                      | <i>B. thuringiensis</i> subsp. <i>kurstaki</i> strain containing <i>cryIAC</i> gene                                                                          | (12)       |
| HD $\Delta$ sigE                           | <i>B. thuringiensis</i> HD-73 Mutant type, $\Delta$ <i>sigE</i>                                                                                              | 24         |
| HD $\Delta$ sigH                           | <i>B. thuringiensis</i> HD-73 Mutant type, $\Delta$ <i>sigH</i>                                                                                              | This study |
| HD $\Delta$ sigK                           | <i>B. thuringiensis</i> HD-73 Mutant type, $\Delta$ <i>sigK</i>                                                                                              | (13)       |
| HD(P <sub>orf1</sub> -LacZ)                | HD-73 strain containing plasmid pHTPorf1                                                                                                                     | This study |
| HD (P <sub>cry8E</sub> -LacZ)              | HD-73 strain containing plasmid pHTPcry8E                                                                                                                    | This study |
| HD(P <sub>orf1-cry8E</sub> -LacZ)          | HD-73 strain containing plasmid pHTPorf1-cry8E                                                                                                               | This study |
| HD $\Delta$ sigE (P <sub>orf1</sub> -LacZ) | <i>sigE</i> mutant containing plasmid pHTPorf1                                                                                                               | This study |
| HD $\Delta$ sigK (P <sub>orf1</sub> -LacZ) | <i>sigE</i> mutant containing plasmid pHTPorf1                                                                                                               | This study |
| HD $\Delta$ sigH(P <sub>cry8E</sub> -LacZ) | <i>sigH</i> mutant containing plasmid pHTPcry8E                                                                                                              | This study |
| Plasmids                                   |                                                                                                                                                              |            |
| pMAD                                       | <i>B. thuringiensis-E. coli</i> shuttle, temperature-sensitive plasmid, Amp <sup>r</sup> , Ery <sup>r</sup>                                                  | 4          |
| pMAD $\Delta$ sigE                         | pMAD carrying partial <i>sigE</i> flank gene                                                                                                                 | 24         |
| pMAD $\Delta$ sigH                         | pMAD carrying partial <i>sigH</i> flank gene                                                                                                                 | This study |
| pHT304-18Z                                 | Promoterless lacZ Vector, Eryr, Ampr                                                                                                                         | 2          |
| pHTPorf1                                   | Amp <sup>r</sup> , Erm <sup>r</sup> , pHT304-18Z carrying <i>Porf1</i>                                                                                       | This study |
| pHTPcry8E                                  | Amp <sup>r</sup> , Erm <sup>r</sup> , pHT304-18Z carrying <i>P8E</i>                                                                                         | This study |
| pHTPorf1-8E                                | Amp <sup>r</sup> , Erm <sup>r</sup> , pHT304-18Z carrying <i>cry8E</i> operon promoter                                                                       | This study |

**TABLE S2.** Sequences of oligonucleotide primers used in this study

| <b>Primer</b> | <b>Sequence 5'-3'</b>                                          |
|---------------|----------------------------------------------------------------|
| sigE1         | CGCGGATCCGTGTATACAGCATTGGGGTTTA<br><i>BamH I</i>               |
| sigE2'        | GAAATGTATGACTGTGGTCTTAATTCCTAATTCAG                            |
| sigE3'        | CTGAAATTAGGAATTAAGACCACAGTCATACATTTTC                          |
| sigE4         | ACGCGTCGACCCATAACAAAGATAGGATCTC-3'<br><i>Sal I</i>             |
| sigH1F        | CGGGATCCGAAGGTGCTGCCAAAGGACA                                   |
| sigH1R        | TTGTTACTTGATCCCTCCGACCG                                        |
| sigH2F        | GGATCAAGTAACAAGAGCTACAGGTGTAATAAAT                             |
| sigH2R        | ACGCGTCGACTAATCTGCGAATGGTCCCTCA                                |
| YZsigH5       | TTTGAAGCGCTGATTGGCTATC                                         |
| YZsigH3       | GAAGTCAAGTTCAACTGGAGTCTCG                                      |
| RTorf1-5      | GCTCCATTGATTGATAGGAGGTG                                        |
| RTorf1-3      | CAACTTTATCACGACATCACGTA                                        |
| RT8E5         | ATGAGTCCAAATAATCAAATGAATATG                                    |
| RT8E3         | CACAATCGGTCCCTACCAATGGA                                        |
| RTCOorf1      | AGTACGTGATGTCGTGATAAAGTTG                                      |
| RTCO8E        | TAATGCATTTGTTGGATCACTCG                                        |
| 16SrDNA5      | ATCTTCCGCAATGGACGAAAGTC                                        |
| 16SrDNA5      | GGTCTTGCAGCTCTTTGTACCGT                                        |
| Porf1-5       | AA <u>ACTGCAG</u> AATGCACCTCCAATTGTTAATTATGT<br><i>Pst I</i>   |
| Porf1-3       | CG <u>GGATCC</u> TTTTTTCTGTGCACCTCCTATCG<br><i>BamH I</i>      |
| Pcry8E5       | AA <u>ACTGCAG</u> TTTCAATAGAAACAAAAACGTTCT<br><i>Pst I</i>     |
| Pcry8E3       | CG <u>GGATCC</u> CTATTTTCCTCCTATAACATAACAAGAT<br><i>BamH I</i> |
| 8ERace        | CACAATCGGTCCCTACCAATGGA                                        |
| NestRace      | GGTCCTACCAATGGA                                                |
